# Supplementary material
Source: PubMed Central journal article supplement (PMC6047900)
Supplement: NIHMS978256-supplement-1.pdf [file NIHMS978256-supplement-1.pdf]

Supplemental Table 1. Questions posed to the brain initiative leaders and their corresponding labels in the main document.

| # | Label in Profile                                                           | Question                                                                                                                                                                                                                              |
|---|----------------------------------------------------------------------------|---------------------------------------------------------------------------------------------------------------------------------------------------------------------------------------------------------------------------------------|
| 1 |                                                                            | What is the timeline of your program (i.e. start date, end date if it exists)?                                                                                                                                                        |
| 2 |                                                                            | What is total amount of funding for your program (in your currency of choice). How many independent projects does your program currently fund?                                                                                        |
| 3 | Goals                                                                      | Understanding the brain is a massive challenge. Each of the initiatives has a somewhat unique focus. What are the core goals of your program? Can you discuss the challenges in deciding what areas to focus on?                      |
| 4 | Measuring 10-15 year impact                                                | How will you define the success/impact of your program in 10-15 years?                                                                                                                                                                |
| 5 | Achievements                                                               | Can you highlight some specific achievements that are emerging from your program?                                                                                                                                                     |
| 6 | Challenges                                                                 | As each of the worldwide programs is independent, what challenges do you foresee in integrating efforts across the globe?                                                                                                             |
| 7 | Efforts to address reproducibility, data availability and resource sharing | Improving standards in reproducibility, data availability, and resource sharing are critical to ensuring the impact of research as well as global accessibility. What efforts is the BRAIN Initiative making to address these issues? |
